# Supplementary material for: The Effects on Immune Function and Digestive Health of Consuming the Skin and Flesh of Zespri® SunGold Kiwifruit (Actinidia Chinensis var. Chinensis ‘Zesy002’) in Healthy and IBS-Constipated Individuals
Source: Nutrients. 2020 May 18;12(5):1453. doi: 10.3390/nu12051453 (PMC7284715; doi:10.3390/nu12051453)
Supplement: Supplementary file 1 [file nutrients-12-01453-s001.zip]

Archive with 6 entries (6 files):
- Birmingham IBS questionnaire.pdf
- copy of daily diary.pdf
- Dietary Eating Habits Questionnaire.pdf
- GSRS - US-English.pdf
- Participant Screening Questionnaire.pdf
- ROME III ADULT QUESTIONNAIRE FOR CONSTIPATION (SunGold).pdf
